# Supplementary material for: A noble and single source precursor for the synthesis of metal-rich sulphides embedded in an N-doped carbon framework for highly active OER electrocatalysts
Source: Royal Society of Chemistry journal article supplement (doi:10.1039/c6dt00536e), 2016-01-01
Supplement: c6dt00536e1.pdf [file c6dt00536e1.pdf]

### Supplementary Information:

## Noble and single source precursor for the synthesis of metal-rich sulphides embedded in N-doped carbon framework for highly active OER electrocatalysts

by Barun Kumar Barman\* and Karuna Kar Nanda\*

Material Research Centre, Indian Institute of Science, Bangalore-560012, India

### Experimental section:

We prepare the metal chelate complex by adding 0.5 M  $\text{NiSO}_4 \cdot 6\text{H}_2\text{O}$  and  $\text{CoSO}_4 \cdot \text{H}_2\text{O}$  aqueous solution in excess volume of ethylenediamine (EDA). It precipitates immediately in the form of  $[\text{M}^{\text{II}}(\text{EDA})_3]\text{SO}_4$  complex where  $\text{M} = \text{Co}^{2+}, \text{Ni}^{2+}$ . We wash the complex with de-ionised water/ethanol and dried at  $80^\circ\text{C}$  and collected the solid metal-chelate complex. For the synthesis of metal sulphide embedded N-doped carbon nanostructures, we take 0.5 g of metal complex in quartz tube of 1.0 cm diameter with one end closed and the open end is closed by rubber bladder. Then the complex is pyrolyzed at different temperatures between  $750$  to  $950^\circ\text{C}$  for 2 h. Schematic of the experimental set-up is shown in Fig. 1

### ESI-1

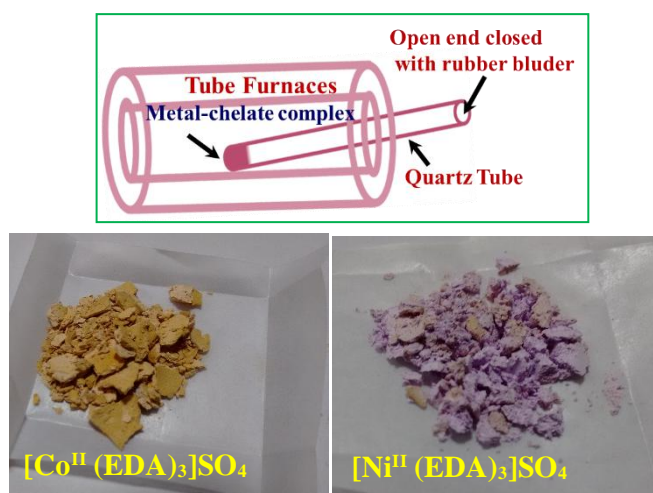

**Fig.1.** Schematic of the experimental set-up and photographs of  $[\text{M}^{\text{II}}(\text{EDA})_3]\text{SO}_4$  precursor.

### Physical characterizations

Powder X-ray diffraction (XRD) patterns are recorded using PAN analytical instrument using a  $\text{Cu K}_\alpha$  ( $\lambda = 1.54 \text{ \AA}$ ) radiation source. Scanning electron microscope (SEM) images and Energy-dispersive X-ray spectroscopy (EDS) are taken on a FE-SEM, FEI-INSPECTF50

instrument. Transmission electron microscope (TEM), high resolution TEM (HRTEM) and selected area electron diffraction (SAED) pattern are obtained with a TEM, JEOL- JEM-2100F operated a 200 kV accelerating voltage. For TEM analysis, the samples are dispersed in ethanol solution and drop-casted on carbon coated copper grid, and dried. Raman spectroscopy experiments are performed on a WITec 300 confocal microscope using a Nd:YAG laser (532 nm) as an excitation source, while X-ray photoelectron spectroscopy (XPS) experiments are performed on an ESCALAB 250 (Thermo Electron) with a monochromatic Al  $K_{\alpha}$  (1486.6 eV) source for the elemental analysis. The surface atomic concentrations are determined from the peak areas using the atomic sensitivity factors reported by Scofield. The binding energy is calibrated by placing the principal C1s peak at 284.6 eV.

### **Electrochemical OER measurements**

Electrochemical oxygen evolution reaction (OER) measurements are conducted using electrochemical work station with rotating disk electrode and Bipotentiostat (CH Instruments). An ink of the hybrids or RuO<sub>2</sub> are prepared from ultrasonically dispersed 5 mg catalyst in 1 ml of ethanol solution. Then, 3  $\mu$ L of catalyst ink are added with the 10 % of Nafion solution. Subsequently, the ink is dispersed on a glassy carbon rotating disk electrode (RDE) followed by drying at 60 °C. The catalyst loadings on RDE are 0.22 mg/cm<sup>2</sup> for all hybrids and RuO<sub>2</sub>. A conventional three-electrode cell is employed incorporating an AgCl/Ag (3M KCl) as the reference electrode, a Pt wire as the counter electrode and the catalyst film coated RDE as the working electrode. OER measurements were carried out at rotation speed at 600 rpm N<sub>2</sub> saturated 0.1 M and 1 M KOH aqueous solution.

### ESI-2: Ni<sub>3</sub>S<sub>2</sub>@NC

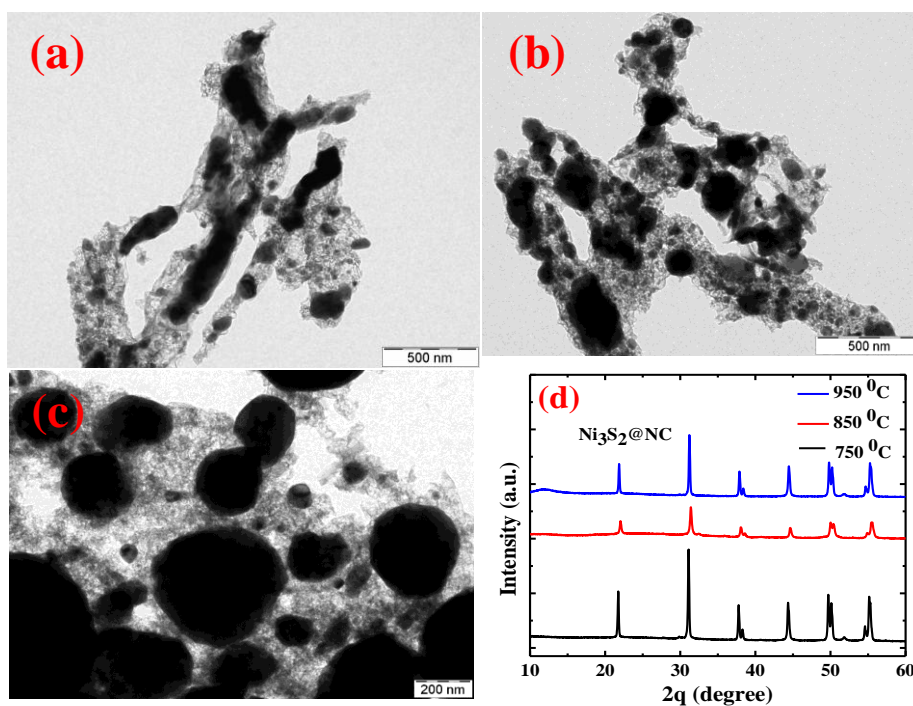

**Fig.2** (a, b and c) TEM images of Ni<sub>3</sub>S<sub>2</sub>@NC which are synthesized at 750 °C, 850 °C and 950 °C reaction temperature for 2h. (d) Powder XRD pattern of the corresponding sample.

### ESI-3: Co<sub>9</sub>S<sub>8</sub>@NC

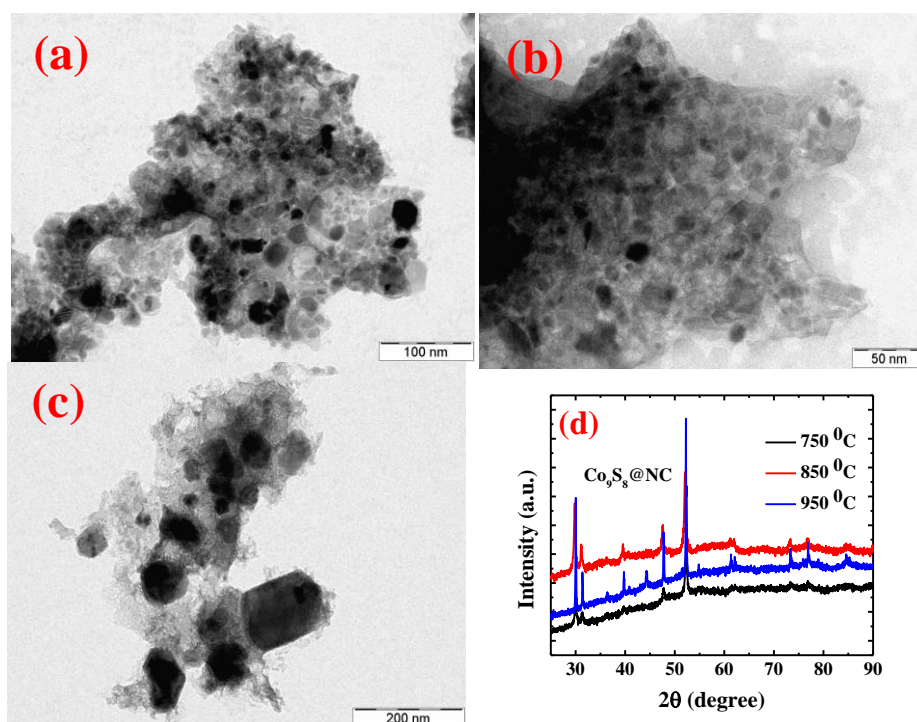

**Fig.3** (a, b and c) TEM images of Co<sub>9</sub>S<sub>8</sub>@NC which are synthesized at 750 °C, 850 °C and 950 °C reaction temperature for 2h. (d) Powder XRD pattern of the corresponding sample.

#### ESI-4: Raman spectra

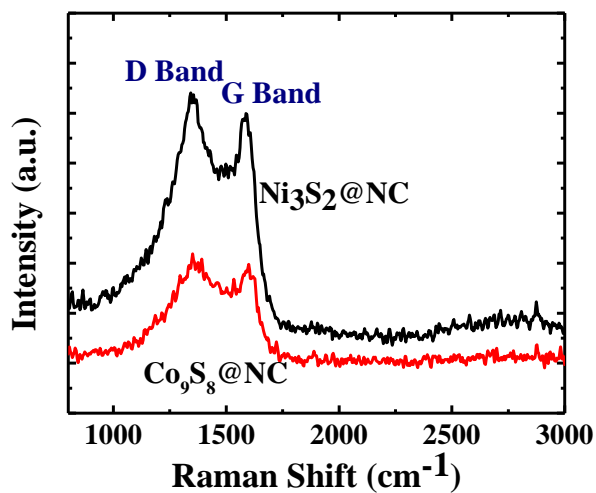

Fig. 4 Raman spectra of Ni<sub>3</sub>S<sub>2</sub>@NC and Co<sub>9</sub>S<sub>8</sub>@NC.

#### ESI-5: XPS survey spectrum of Co<sub>9</sub>S<sub>8</sub>@NC hybrid

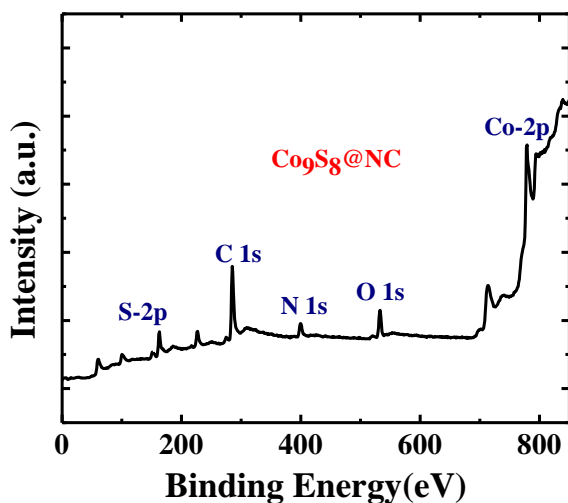

Fig. 5 XPS survey spectrum of Co<sub>9</sub>S<sub>8</sub>@NC synthesized from [Co<sup>II</sup> (EDA)<sub>3</sub>]SO<sub>4</sub> complex at 850 °C for 2 h.

**ESI-6: XPS survey spectrum of Ni<sub>3</sub>S<sub>2</sub>@NC hybrid**

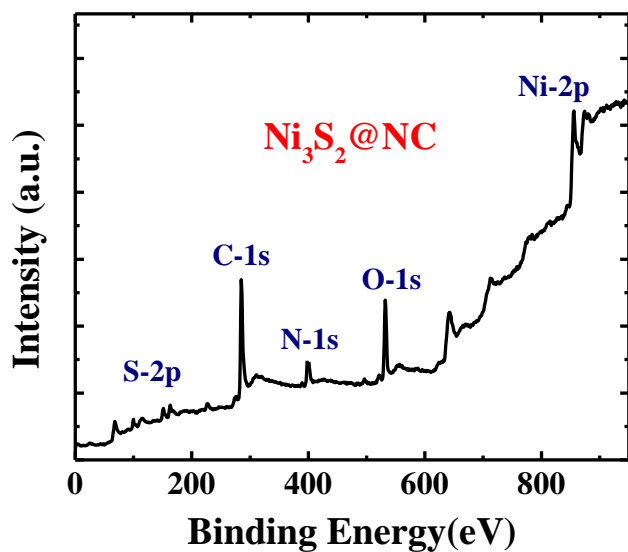

**Fig. 6** XPS survey spectrum of Ni<sub>3</sub>S<sub>2</sub>@NC synthesized from [Ni<sup>II</sup> (EDA)<sub>3</sub>]SO<sub>4</sub> complex at 850 °C for 2 h.

**ESI-7: C-1s and N-1s of Co<sub>9</sub>S<sub>8</sub>@NC hybrid**

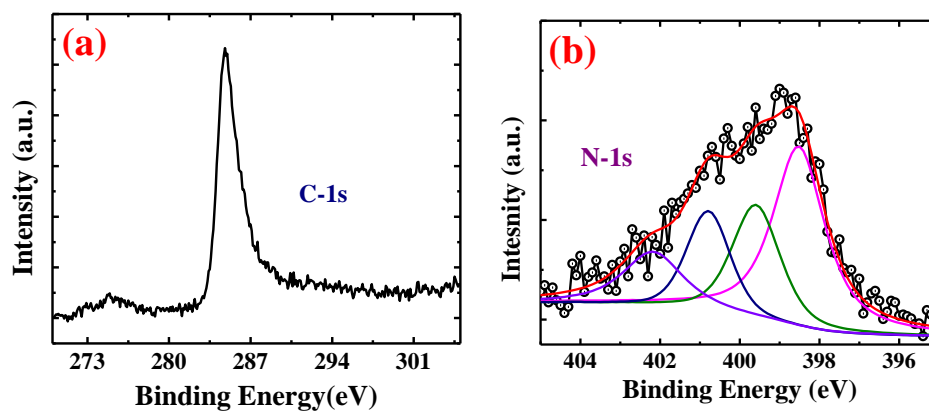

**Fig. 7** (a and b) HR C1s and N 1s XPS spectrum of Co<sub>9</sub>S<sub>8</sub>@NC hybrid synthesized at 850 °C.

### ESI-8: C1s and N1s XPS spectra of Ni<sub>3</sub>S<sub>2</sub>@NC hybrid

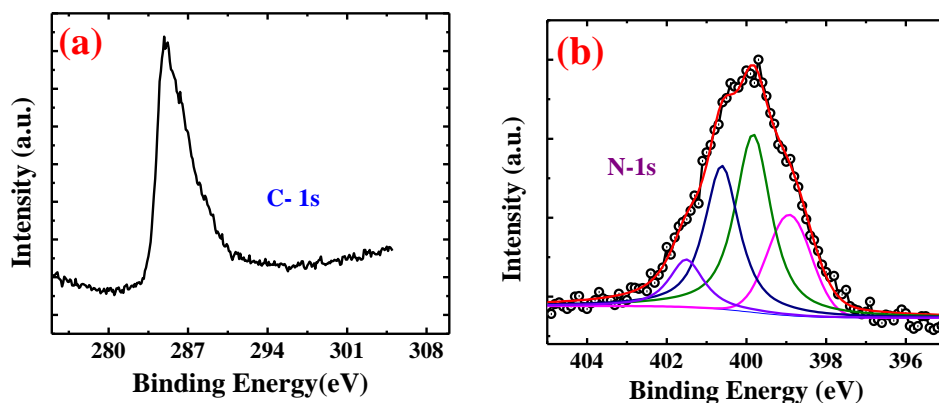

**Fig. 8** (a and b) HR C1s and N1s XPS spectra of Ni<sub>3</sub>S<sub>2</sub>@NC hybrid synthesized at 850 °C.

### ESI-9: OER study

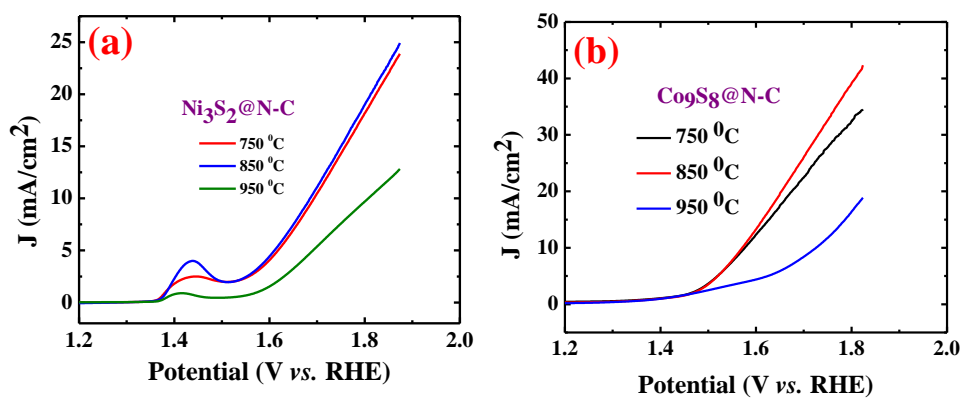

**Fig.9** (a and b) OER activity of Ni<sub>3</sub>S<sub>2</sub>@N-C and Co<sub>9</sub>S<sub>8</sub>@N-C which are synthesized at different temperature.

### ESI-10: OER stability of RuO<sub>2</sub>

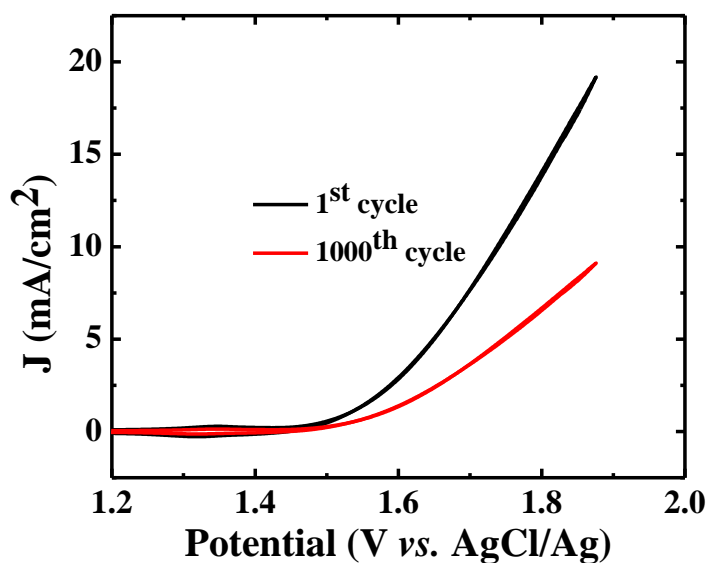

**Fig. 10** Stability curve for commercial RuO<sub>2</sub> representing 1<sup>st</sup> and after 1000<sup>th</sup> cycle (scan rate 100 mV/s and rotation speed of 600 rpm).

### ESI-11: OER stability of Ni<sub>3</sub>S<sub>2</sub>@NC

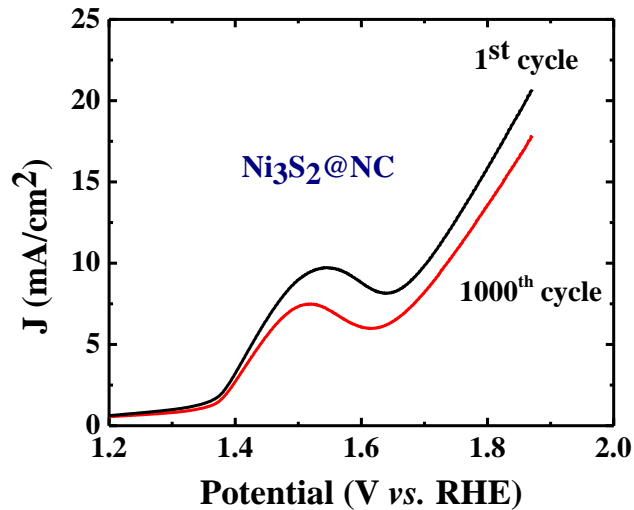

**Fig. 11** Stability curve for Ni<sub>3</sub>S<sub>2</sub>@NC hybrid representing 1<sup>st</sup> and after 1000<sup>th</sup> cycle (scan rate 50mV/s and rotation speed of 600 rpm).

## ESI-12: Capacitance

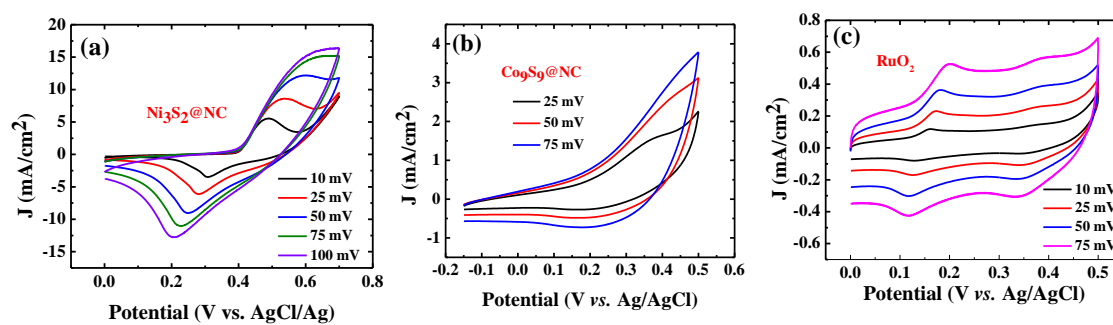

**Fig. 12** (a, b and c) Electrochemical cyclic voltammetry curves of capacitance performances of Ni<sub>3</sub>S<sub>2</sub>@NC, Co<sub>9</sub>S<sub>8</sub>@NC and RuO<sub>2</sub> at different scan rate in 0.1M KOH solution as electrolyte.
